# Supplementary material for: Carbon dioxide (CO2) levels this century will alter the protein, micronutrients, and vitamin content of rice grains with potential health consequences for the poorest rice-dependent countries
Source: PubMed Central journal article supplement — Sci Adv. 2018 May 23;4(5):eaaq1012. doi: 10.1126/sciadv.aaq1012 (PMC5966189; doi:10.1126/sciadv.aaq1012), 2018-05-23
Supplement: aaq1012_SM.pdf [file aaq1012_SM.pdf]

## Supplementary Materials for

### **Carbon dioxide (CO<sub>2</sub>) levels this century will alter the protein, micronutrients, and vitamin content of rice grains with potential health consequences for the poorest rice-dependent countries**

Chunwu Zhu, Kazuhiko Kobayashi, Irakli Loladze, Jianguo Zhu, Qian Jiang, Xi Xu, Gang Liu, Saman Seneweera, Kristie L. Ebi, Adam Drewnowski, Naomi K. Fukagawa, Lewis H. Ziska

Published 23 May 2018, *Sci. Adv.* **4**, eaq1012 (2018)  
DOI: 10.1126/sciadv.aq1012

#### **This PDF file includes:**

- table S1. Elution procedures for vitamin B and vitamin E.
- table S2. Compound parameters for vitamins B1, B2, B5, B6, B9 and E.
- fig. S1. As for Fig. 3, but for vitamin E ( $\alpha$ -tocopherol) (see Methods for additional details).

**table S1. Elution procedures for vitamin B and vitamin E.** Gradient elution procedures for Vitamin B (A) and Vitamin E (B). The mobile phase consisted of eluent A (Methyl alcohol) and eluent B (0.1% formic acid in water).

**A.**

| Time (min) | Flow rate (ml/min) | A : B (% , v/v) |     |
|------------|--------------------|-----------------|-----|
|            |                    | A               | B   |
| 0.00       | 0.6                | 0               | 100 |
| 0.00       | 0.6                | 5               | 95  |
| 1.00       | 0.6                | 95              | 5   |
| 3.50       | 0.6                | 95              | 5   |
| 3.51       | 0.6                | 0               | 100 |
| 5.50       | 0.6                | 0               | 100 |

**B.**

| Time (min) | Flow rate (ml/min) | A:B (% , v/v) |    |
|------------|--------------------|---------------|----|
|            |                    | A             | B  |
| 0          | 0.6                | 80            | 20 |
| 0.5        | 0.6                | 80            | 20 |
| 2.0        | 0.6                | 100           | 0  |
| 6.00       | 0.6                | 100           | 0  |
| 6.01       | 0.6                | 80            | 20 |
| 8.00       | 0.6                | 80            | 20 |

**table S2. Compound parameters for vitamins B1, B2, B5, B6, B9 and E.**

\*for quantification

| Vitamin                      | Precursor Ion (m/z) | Product Ion (m/z) | Retention time (min) | Collision energy (V) |
|------------------------------|---------------------|-------------------|----------------------|----------------------|
| B1                           | 265.3               | 81                | 1.51                 | 30                   |
|                              |                     | 122*              |                      | 13                   |
| B2                           | 377.5               | 172.1             | 4.26                 | 30                   |
|                              |                     | 243.3*            |                      | 17                   |
| B5                           | 220.2               | 90.1*             | 4.04                 | 14                   |
|                              |                     | 184.2             |                      | 12                   |
| B6                           | 170                 | 77.1*             | 2.02                 | 32                   |
|                              |                     | 152.2             |                      | 10                   |
| B9                           | 442.2               | 120.3             | 4.11                 | 27                   |
|                              |                     | 295.5*            |                      | 15                   |
| E<br>( $\alpha$ -tocopherol) | 431.3               | 137               | 2.92                 | 34                   |
|                              |                     | 165*              |                      | 28                   |

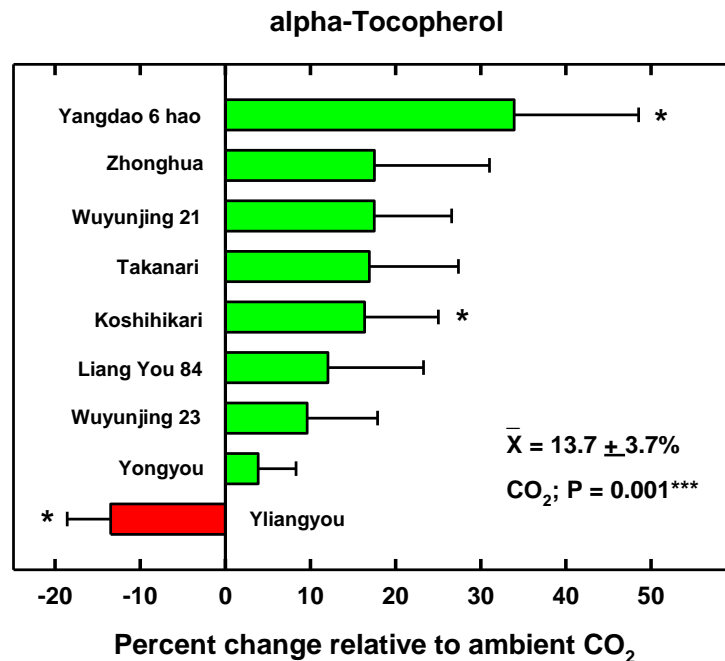

**fig. S1. As for Fig. 3, but for vitamin E ( $\alpha$ -tocopherol) (see Methods for additional details).**
